# Supplementary material
Source: publisher figshare collection journal article supplement (https://acs.figshare.com/ndownloader/files/3794902)
Supplement: Supplementary file 1 [file 3794902]

# 2-Vinyl-Threoninol Derivatives via Acid Catalyzed Allylic Substitution 
# of bis-Imidates
# Varun Kumar, Kristine Klimovica, Dace Rasina, Aigars Jirgensons* 
# Latvian Institute of Organic Synthesis, Aizkraukles 21, Riga, Latvia, LV 1006

# CIF for compound 10

 
data_vk-355 
 
_audit_creation_method            SHELXL-97 
_chemical_name_systematic 
; 
 ? 
; 
_chemical_name_common             ? 
_chemical_melting_point           ? 
_chemical_formula_moiety          ? 
_chemical_formula_sum 
 'C16 H30 Cl3 N O3 Si' 
_chemical_formula_weight          418.85 
 
loop_ 
 _atom_type_symbol 
 _atom_type_description 
 _atom_type_scat_dispersion_real 
 _atom_type_scat_dispersion_imag 
 _atom_type_scat_source 
 'C'  'C'   0.0033   0.0016 
 'International Tables Vol C Tables 4.2.6.8 and 6.1.1.4' 
 'H'  'H'   0.0000   0.0000 
 'International Tables Vol C Tables 4.2.6.8 and 6.1.1.4' 
 'N'  'N'   0.0061   0.0033 
 'International Tables Vol C Tables 4.2.6.8 and 6.1.1.4' 
 'O'  'O'   0.0106   0.0060 
 'International Tables Vol C Tables 4.2.6.8 and 6.1.1.4' 
 'Si'  'Si'   0.0817   0.0704 
 'International Tables Vol C Tables 4.2.6.8 and 6.1.1.4' 
 'Cl'  'Cl'   0.1484   0.1585 
 'International Tables Vol C Tables 4.2.6.8 and 6.1.1.4' 
 
_symmetry_cell_setting            'monoclinic'
_symmetry_space_group_name_H-M    'P 21/n' 
 
loop_ 
 _symmetry_equiv_pos_as_xyz 
 'x, y, z' 
 '-x+1/2, y+1/2, -z+1/2' 
 '-x, -y, -z' 
 'x-1/2, -y-1/2, z-1/2' 
 
_cell_length_a                    14.9340(3) 
_cell_length_b                    10.3766(3) 
_cell_length_c                    15.7056(4) 
_cell_angle_alpha                 90.00 
_cell_angle_beta                  116.087(2) 
_cell_angle_gamma                 90.00 
_cell_volume                      2185.87(10) 
_cell_formula_units_Z             4 
_cell_measurement_temperature     173(2) 
_cell_measurement_reflns_used     10404
_cell_measurement_theta_min        0.998
_cell_measurement_theta_max        30.034
 
_exptl_crystal_description        'plate' 
_exptl_crystal_colour             'colorless' 
_exptl_crystal_size_max           0.21
_exptl_crystal_size_mid           0.16 
_exptl_crystal_size_min           0.09 
_exptl_crystal_density_meas       ? 
_exptl_crystal_density_diffrn     1.273 
_exptl_crystal_density_method     'not measured' 
_exptl_crystal_F_000              888 
_exptl_absorpt_coefficient_mu     0.487 
_exptl_absorpt_correction_type    none 
_exptl_absorpt_correction_T_min   ? 
_exptl_absorpt_correction_T_max   ? 
_exptl_absorpt_process_details    ? 
 
_exptl_special_details 
; 
 ? 
; 
 
_diffrn_ambient_temperature       173(2) 
_diffrn_radiation_wavelength      0.71073 
_diffrn_radiation_type            MoK\a 
_diffrn_radiation_source          'fine-focus sealed tube' 
_diffrn_radiation_monochromator   graphite 
_diffrn_measurement_device_type   'Nonius KappaCCD'  
_diffrn_measurement_method        'CCD'  
_diffrn_detector_area_resol_mean  ? 
_diffrn_standards_number          ? 
_diffrn_standards_interval_count  ? 
_diffrn_standards_interval_time   ? 
_diffrn_standards_decay_%         ? 
_diffrn_reflns_number             10444 
_diffrn_reflns_av_R_equivalents   0.0353 
_diffrn_reflns_av_sigmaI/netI     0.0565 
_diffrn_reflns_limit_h_min        -20 
_diffrn_reflns_limit_h_max        21 
_diffrn_reflns_limit_k_min        -13 
_diffrn_reflns_limit_k_max        14 
_diffrn_reflns_limit_l_min        -22 
_diffrn_reflns_limit_l_max        22 
_diffrn_reflns_theta_min          3.49 
_diffrn_reflns_theta_max          30.06 
_reflns_number_total              6363 
_reflns_number_gt                 4112 
_reflns_threshold_expression      >2sigma(I) 
 
_computing_data_collection       'KappaCCD Server Software (Nonius, 1997)'
_computing_cell_refinement       'HKL Scalepack (Otwinovski & Minor, 1997)'
_computing_data_reduction        
'HKL Denzo and Scalepack (Otwinovski & Minor, 1997)'
_computing_structure_solution    'SIR2011 (Burla, 2012)'
_computing_structure_refinement  'SHELXL-97 (Sheldrick, 2008)'
_computing_molecular_graphics    'ORTEP-3 (Farrugia, 2012)'
_computing_publication_material   ? 
 
_refine_special_details 
; 
 Refinement of F^2^ against ALL reflections.  The weighted R-factor wR and 
 goodness of fit S are based on F^2^, conventional R-factors R are based 
 on F, with F set to zero for negative F^2^. The threshold expression of 
 F^2^ > 2sigma(F^2^) is used only for calculating R-factors(gt) etc. and is 
 not relevant to the choice of reflections for refinement.  R-factors based 
 on F^2^ are statistically about twice as large as those based on F, and R- 
 factors based on ALL data will be even larger. 
; 
 
_refine_ls_structure_factor_coef  Fsqd  
_refine_ls_matrix_type            full 
_refine_ls_weighting_scheme       calc  
_refine_ls_weighting_details 
 'calc w=1/[\s^2^(Fo^2^)+(0.0487P)^2^+1.2251P] where P=(Fo^2^+2Fc^2^)/3' 
_atom_sites_solution_primary      direct 
_atom_sites_solution_secondary    difmap 
_atom_sites_solution_hydrogens    geom 
_refine_ls_hydrogen_treatment     constr 
_refine_ls_extinction_method      none 
_refine_ls_extinction_coef        ? 
_refine_ls_number_reflns          6363 
_refine_ls_number_parameters      252 
_refine_ls_number_restraints      0 
_refine_ls_R_factor_all           0.1013 
_refine_ls_R_factor_gt            0.0571 
_refine_ls_wR_factor_ref          0.1441 
_refine_ls_wR_factor_gt           0.1223 
_refine_ls_goodness_of_fit_ref    1.019 
_refine_ls_restrained_S_all       1.019 
_refine_ls_shift/su_max           0.001 
_refine_ls_shift/su_mean          0.000 
 
loop_ 
 _atom_site_label 
 _atom_site_type_symbol 
 _atom_site_fract_x 
 _atom_site_fract_y 
 _atom_site_fract_z 
 _atom_site_U_iso_or_equiv 
 _atom_site_adp_type 
 _atom_site_occupancy 
 _atom_site_symmetry_multiplicity 
 _atom_site_calc_flag 
 _atom_site_refinement_flags 
 _atom_site_disorder_assembly 
 _atom_site_disorder_group 
Si1 Si 0.82770(4) 0.12868(6) 0.59191(4) 0.03890(16) Uani 1 1 d . . . 
Cl1A Cl 1.1090(4) -0.4870(4) 0.7046(4) 0.0966(14) Uani 0.50 1 d P A 1 
Cl2A Cl 0.9776(4) -0.4001(5) 0.7463(4) 0.1168(18) Uani 0.50 1 d P A 1 
Cl3A Cl 0.9499(4) -0.3127(6) 0.5664(4) 0.0655(11) Uani 0.50 1 d P A 1 
Cl1B Cl 1.1166(3) -0.4647(4) 0.6727(4) 0.116(2) Uani 0.50 1 d P A 2 
Cl2B Cl 0.9443(3) -0.3847(4) 0.7236(4) 0.0895(14) Uani 0.50 1 d P A 2 
Cl3B Cl 0.9693(5) -0.3260(7) 0.5585(5) 0.094(2) Uani 0.50 1 d P A 2 
O1 O 0.89841(9) 0.03941(12) 0.68476(8) 0.0295(3) Uani 1 1 d . . . 
O3 O 1.18560(11) -0.22031(16) 0.74568(12) 0.0529(4) Uani 1 1 d . . . 
N1 N 1.04387(11) -0.13176(15) 0.74015(11) 0.0338(4) Uani 1 1 d . . . 
H1 H 0.9840 -0.1514 0.7299 0.041 Uiso 1 1 calc R . . 
O2 O 1.12025(13) 0.19581(17) 0.71163(17) 0.0678(6) Uani 1 1 d . . . 
H2 H 1.1782 0.2134 0.7240 0.102 Uiso 1 1 calc R . . 
C7 C 0.98439(13) 0.07406(19) 0.76974(13) 0.0318(4) Uani 1 1 d . . . 
H7 H 0.9959 0.1665 0.7666 0.038 Uiso 1 1 calc R . . 
C12 C 1.10539(16) 0.0616(2) 0.69747(17) 0.0446(5) Uani 1 1 d . . . 
H12A H 1.1662 0.0217 0.7023 0.053 Uiso 1 1 calc R . . 
H12B H 1.0532 0.0454 0.6342 0.053 Uiso 1 1 calc R . . 
C11 C 1.07610(14) 0.00080(18) 0.77069(14) 0.0321(4) Uani 1 1 d . . . 
C15 C 1.09761(15) -0.2247(2) 0.72665(14) 0.0381(5) Uani 1 1 d . A . 
C8 C 0.96275(16) 0.0513(2) 0.85566(14) 0.0404(5) Uani 1 1 d . . . 
H8 H 1.0253 0.0663 0.9126 0.048 Uiso 1 1 calc R . . 
C4 C 0.69972(15) 0.0557(2) 0.54432(15) 0.0406(5) Uani 1 1 d . . . 
C13 C 1.16296(15) 0.0081(2) 0.86797(16) 0.0451(5) Uani 1 1 d . . . 
H13 H 1.1937 0.0882 0.8857 0.054 Uiso 1 1 calc R . . 
C9 C 0.88749(19) 0.1494(3) 0.85734(18) 0.0560(6) Uani 1 1 d . . . 
H9A H 0.9101 0.2349 0.8535 0.084 Uiso 1 1 calc R . . 
H9B H 0.8810 0.1404 0.9152 0.084 Uiso 1 1 calc R . . 
H9C H 0.8240 0.1347 0.8043 0.084 Uiso 1 1 calc R . . 
C10 C 0.92911(19) -0.0855(3) 0.86274(16) 0.0508(6) Uani 1 1 d . . . 
H10A H 0.8726 -0.1077 0.8046 0.076 Uiso 1 1 calc R . . 
H10B H 0.9110 -0.0903 0.9142 0.076 Uiso 1 1 calc R . . 
H10C H 0.9826 -0.1446 0.8739 0.076 Uiso 1 1 calc R . . 
C2 C 0.62806(18) 0.1361(3) 0.45923(19) 0.0593(7) Uani 1 1 d . . . 
H2A H 0.5628 0.0981 0.4334 0.089 Uiso 1 1 calc R . . 
H2B H 0.6518 0.1379 0.4115 0.089 Uiso 1 1 calc R . . 
H2C H 0.6248 0.2224 0.4797 0.089 Uiso 1 1 calc R . . 
C14 C 1.20002(19) -0.0836(3) 0.92997(18) 0.0604(7) Uani 1 1 d . . . 
H14A H 1.1725 -0.1658 0.9163 0.072 Uiso 1 1 calc R . . 
H14B H 1.2541 -0.0671 0.9880 0.072 Uiso 1 1 calc R . . 
C1 C 0.66075(18) 0.0547(3) 0.6199(2) 0.0589(7) Uani 1 1 d . . . 
H1A H 0.6598 0.1411 0.6414 0.088 Uiso 1 1 calc R . . 
H1B H 0.7036 0.0024 0.6725 0.088 Uiso 1 1 calc R . . 
H1C H 0.5944 0.0199 0.5932 0.088 Uiso 1 1 calc R . . 
C16 C 1.03618(17) -0.3496(2) 0.68142(16) 0.0452(5) Uani 1 1 d . . . 
C3 C 0.7010(2) -0.0832(2) 0.5117(2) 0.0656(8) Uani 1 1 d . . . 
H3A H 0.7447 -0.1343 0.5647 0.098 Uiso 1 1 calc R . . 
H3B H 0.7243 -0.0841 0.4637 0.098 Uiso 1 1 calc R . . 
H3C H 0.6348 -0.1183 0.4864 0.098 Uiso 1 1 calc R . . 
C5 C 0.8290(2) 0.2989(2) 0.6268(2) 0.0844(11) Uani 1 1 d . . . 
H5A H 0.8074 0.3045 0.6760 0.127 Uiso 1 1 calc R . . 
H5B H 0.7848 0.3481 0.5729 0.127 Uiso 1 1 calc R . . 
H5C H 0.8954 0.3325 0.6498 0.127 Uiso 1 1 calc R . . 
C6 C 0.8728(3) 0.1176(5) 0.4996(2) 0.1110(17) Uani 1 1 d . . . 
H6A H 0.9327 0.1673 0.5186 0.166 Uiso 1 1 calc R . . 
H6B H 0.8227 0.1504 0.4408 0.166 Uiso 1 1 calc R . . 
H6C H 0.8864 0.0291 0.4915 0.166 Uiso 1 1 calc R . . 
 
loop_ 
 _atom_site_aniso_label 
 _atom_site_aniso_U_11 
 _atom_site_aniso_U_22 
 _atom_site_aniso_U_33 
 _atom_site_aniso_U_23 
 _atom_site_aniso_U_13 
 _atom_site_aniso_U_12 
Si1 0.0306(3) 0.0387(3) 0.0459(3) 0.0125(2) 0.0155(2) 0.0019(2) 
Cl1A 0.092(2) 0.0371(10) 0.146(3) -0.0113(13) 0.0389(16) 0.0176(10) 
Cl2A 0.236(5) 0.0559(17) 0.0935(17) -0.0217(12) 0.104(3) -0.068(3) 
Cl3A 0.0561(12) 0.0570(12) 0.054(2) -0.0106(12) -0.0034(13) -0.0104(10) 
Cl1B 0.0497(11) 0.068(2) 0.186(4) -0.083(3) 0.0108(19) 0.0145(14) 
Cl2B 0.118(2) 0.0449(14) 0.166(4) -0.0496(19) 0.118(3) -0.0440(13) 
Cl3B 0.108(4) 0.106(4) 0.0576(14) -0.0220(18) 0.028(2) -0.049(3) 
O1 0.0255(6) 0.0277(7) 0.0346(7) -0.0002(5) 0.0125(5) 0.0002(5) 
O3 0.0325(8) 0.0463(10) 0.0770(11) -0.0081(8) 0.0215(7) 0.0090(7) 
N1 0.0254(7) 0.0272(8) 0.0469(9) -0.0069(7) 0.0142(7) -0.0015(6) 
O2 0.0470(10) 0.0403(10) 0.1273(17) 0.0177(10) 0.0487(11) -0.0009(8) 
C7 0.0280(9) 0.0260(9) 0.0390(10) -0.0044(7) 0.0126(8) -0.0019(7) 
C12 0.0313(10) 0.0450(13) 0.0621(14) 0.0060(10) 0.0248(10) 0.0017(9) 
C11 0.0259(8) 0.0253(9) 0.0430(10) -0.0035(7) 0.0131(8) -0.0027(7) 
C15 0.0349(10) 0.0323(11) 0.0435(11) -0.0044(8) 0.0140(8) 0.0030(8) 
C8 0.0399(11) 0.0446(12) 0.0354(10) -0.0097(9) 0.0155(8) -0.0014(9) 
C4 0.0345(10) 0.0309(10) 0.0478(12) -0.0015(8) 0.0103(9) 0.0006(8) 
C13 0.0316(10) 0.0391(12) 0.0519(12) -0.0078(10) 0.0067(9) -0.0009(9) 
C9 0.0547(14) 0.0639(17) 0.0561(14) -0.0212(12) 0.0305(12) 0.0018(12) 
C10 0.0590(14) 0.0568(15) 0.0432(12) 0.0035(10) 0.0286(11) -0.0051(12) 
C2 0.0407(12) 0.0486(15) 0.0648(15) 0.0041(12) 0.0015(11) 0.0039(11) 
C14 0.0511(14) 0.0532(15) 0.0557(14) -0.0060(12) 0.0041(11) 0.0081(12) 
C1 0.0372(12) 0.0638(17) 0.0781(17) 0.0006(13) 0.0275(12) -0.0070(12) 
C16 0.0454(12) 0.0341(11) 0.0551(13) -0.0094(9) 0.0211(10) 0.0037(9) 
C3 0.0729(18) 0.0363(13) 0.0676(16) -0.0092(12) 0.0125(14) -0.0002(13) 
C5 0.0631(17) 0.0318(13) 0.110(2) 0.0158(14) -0.0063(16) -0.0081(12) 
C6 0.0675(19) 0.214(5) 0.0666(19) 0.070(3) 0.0434(16) 0.040(3) 
 
_geom_special_details 
; 
 All esds (except the esd in the dihedral angle between two l.s. planes) 
 are estimated using the full covariance matrix.  The cell esds are taken 
 into account individually in the estimation of esds in distances, angles 
 and torsion angles; correlations between esds in cell parameters are only 
 used when they are defined by crystal symmetry.  An approximate (isotropic) 
 treatment of cell esds is used for estimating esds involving l.s. planes. 
; 
 
loop_ 
 _geom_bond_atom_site_label_1 
 _geom_bond_atom_site_label_2 
 _geom_bond_distance 
 _geom_bond_site_symmetry_2 
 _geom_bond_publ_flag 
Si1 O1 1.6569(13) . ? 
Si1 C5 1.847(3) . ? 
Si1 C6 1.852(3) . ? 
Si1 C4 1.878(2) . ? 
Cl1A C16 1.732(5) . ? 
Cl2A C16 1.692(5) . ? 
Cl3A C16 1.739(5) . ? 
Cl1B C16 1.741(5) . ? 
Cl2B C16 1.803(4) . ? 
Cl3B C16 1.757(8) . ? 
O1 C7 1.432(2) . ? 
O3 C15 1.214(2) . ? 
N1 C15 1.330(3) . ? 
N1 C11 1.467(2) . ? 
N1 H1 0.8600 . ? 
O2 C12 1.413(3) . ? 
O2 H2 0.8200 . ? 
C7 C8 1.538(3) . ? 
C7 C11 1.561(3) . ? 
C7 H7 0.9800 . ? 
C12 C11 1.534(3) . ? 
C12 H12A 0.9700 . ? 
C12 H12B 0.9700 . ? 
C11 C13 1.510(3) . ? 
C15 C16 1.566(3) . ? 
C8 C9 1.525(3) . ? 
C8 C10 1.527(3) . ? 
C8 H8 0.9800 . ? 
C4 C3 1.533(3) . ? 
C4 C1 1.535(3) . ? 
C4 C2 1.539(3) . ? 
C13 C14 1.299(3) . ? 
C13 H13 0.9300 . ? 
C9 H9A 0.9600 . ? 
C9 H9B 0.9600 . ? 
C9 H9C 0.9600 . ? 
C10 H10A 0.9600 . ? 
C10 H10B 0.9600 . ? 
C10 H10C 0.9600 . ? 
C2 H2A 0.9600 . ? 
C2 H2B 0.9600 . ? 
C2 H2C 0.9600 . ? 
C14 H14A 0.9300 . ? 
C14 H14B 0.9300 . ? 
C1 H1A 0.9600 . ? 
C1 H1B 0.9600 . ? 
C1 H1C 0.9600 . ? 
C3 H3A 0.9600 . ? 
C3 H3B 0.9600 . ? 
C3 H3C 0.9600 . ? 
C5 H5A 0.9600 . ? 
C5 H5B 0.9600 . ? 
C5 H5C 0.9600 . ? 
C6 H6A 0.9600 . ? 
C6 H6B 0.9600 . ? 
C6 H6C 0.9600 . ? 
 
loop_ 
 _geom_angle_atom_site_label_1 
 _geom_angle_atom_site_label_2 
 _geom_angle_atom_site_label_3 
 _geom_angle 
 _geom_angle_site_symmetry_1 
 _geom_angle_site_symmetry_3 
 _geom_angle_publ_flag 
O1 Si1 C5 110.72(11) . . ? 
O1 Si1 C6 110.12(12) . . ? 
C5 Si1 C6 109.4(2) . . ? 
O1 Si1 C4 105.56(8) . . ? 
C5 Si1 C4 112.28(12) . . ? 
C6 Si1 C4 108.67(16) . . ? 
C7 O1 Si1 130.01(12) . . ? 
C15 N1 C11 126.72(16) . . ? 
C15 N1 H1 116.6 . . ? 
C11 N1 H1 116.6 . . ? 
C12 O2 H2 109.5 . . ? 
O1 C7 C8 109.33(15) . . ? 
O1 C7 C11 108.05(14) . . ? 
C8 C7 C11 116.05(16) . . ? 
O1 C7 H7 107.7 . . ? 
C8 C7 H7 107.7 . . ? 
C11 C7 H7 107.7 . . ? 
O2 C12 C11 111.36(19) . . ? 
O2 C12 H12A 109.4 . . ? 
C11 C12 H12A 109.4 . . ? 
O2 C12 H12B 109.4 . . ? 
C11 C12 H12B 109.4 . . ? 
H12A C12 H12B 108.0 . . ? 
N1 C11 C13 112.99(16) . . ? 
N1 C11 C12 107.54(17) . . ? 
C13 C11 C12 109.66(17) . . ? 
N1 C11 C7 107.06(14) . . ? 
C13 C11 C7 110.17(16) . . ? 
C12 C11 C7 109.32(16) . . ? 
O3 C15 N1 126.7(2) . . ? 
O3 C15 C16 119.84(19) . . ? 
N1 C15 C16 113.46(18) . . ? 
C9 C8 C10 110.5(2) . . ? 
C9 C8 C7 110.71(19) . . ? 
C10 C8 C7 114.16(17) . . ? 
C9 C8 H8 107.0 . . ? 
C10 C8 H8 107.0 . . ? 
C7 C8 H8 107.0 . . ? 
C3 C4 C1 108.4(2) . . ? 
C3 C4 C2 109.0(2) . . ? 
C1 C4 C2 108.7(2) . . ? 
C3 C4 Si1 110.60(17) . . ? 
C1 C4 Si1 111.14(15) . . ? 
C2 C4 Si1 108.94(16) . . ? 
C14 C13 C11 127.9(2) . . ? 
C14 C13 H13 116.0 . . ? 
C11 C13 H13 116.0 . . ? 
C8 C9 H9A 109.5 . . ? 
C8 C9 H9B 109.5 . . ? 
H9A C9 H9B 109.5 . . ? 
C8 C9 H9C 109.5 . . ? 
H9A C9 H9C 109.5 . . ? 
H9B C9 H9C 109.5 . . ? 
C8 C10 H10A 109.5 . . ? 
C8 C10 H10B 109.5 . . ? 
H10A C10 H10B 109.5 . . ? 
C8 C10 H10C 109.5 . . ? 
H10A C10 H10C 109.5 . . ? 
H10B C10 H10C 109.5 . . ? 
C4 C2 H2A 109.5 . . ? 
C4 C2 H2B 109.5 . . ? 
H2A C2 H2B 109.5 . . ? 
C4 C2 H2C 109.5 . . ? 
H2A C2 H2C 109.5 . . ? 
H2B C2 H2C 109.5 . . ? 
C13 C14 H14A 120.0 . . ? 
C13 C14 H14B 120.0 . . ? 
H14A C14 H14B 120.0 . . ? 
C4 C1 H1A 109.5 . . ? 
C4 C1 H1B 109.5 . . ? 
H1A C1 H1B 109.5 . . ? 
C4 C1 H1C 109.5 . . ? 
H1A C1 H1C 109.5 . . ? 
H1B C1 H1C 109.5 . . ? 
C15 C16 Cl2A 109.8(2) . . ? 
C15 C16 Cl1A 113.4(2) . . ? 
Cl2A C16 Cl1A 93.5(3) . . ? 
C15 C16 Cl3A 107.9(3) . . ? 
Cl2A C16 Cl3A 110.5(3) . . ? 
Cl1A C16 Cl3A 120.6(3) . . ? 
C15 C16 Cl1B 108.5(2) . . ? 
Cl2A C16 Cl1B 113.0(3) . . ? 
Cl1A C16 Cl1B 20.1(3) . . ? 
Cl3A C16 Cl1B 106.9(3) . . ? 
C15 C16 Cl3B 108.6(3) . . ? 
Cl2A C16 Cl3B 120.7(3) . . ? 
Cl1A C16 Cl3B 110.3(3) . . ? 
Cl3A C16 Cl3B 12.7(4) . . ? 
Cl1B C16 Cl3B 95.0(3) . . ? 
C15 C16 Cl2B 112.9(2) . . ? 
Cl2A C16 Cl2B 15.8(3) . . ? 
Cl1A C16 Cl2B 105.3(3) . . ? 
Cl3A C16 Cl2B 95.2(3) . . ? 
Cl1B C16 Cl2B 123.5(3) . . ? 
Cl3B C16 Cl2B 106.0(3) . . ? 
C4 C3 H3A 109.5 . . ? 
C4 C3 H3B 109.5 . . ? 
H3A C3 H3B 109.5 . . ? 
C4 C3 H3C 109.5 . . ? 
H3A C3 H3C 109.5 . . ? 
H3B C3 H3C 109.5 . . ? 
Si1 C5 H5A 109.5 . . ? 
Si1 C5 H5B 109.5 . . ? 
H5A C5 H5B 109.5 . . ? 
Si1 C5 H5C 109.5 . . ? 
H5A C5 H5C 109.5 . . ? 
H5B C5 H5C 109.5 . . ? 
Si1 C6 H6A 109.5 . . ? 
Si1 C6 H6B 109.5 . . ? 
H6A C6 H6B 109.5 . . ? 
Si1 C6 H6C 109.5 . . ? 
H6A C6 H6C 109.5 . . ? 
H6B C6 H6C 109.5 . . ? 
 
loop_ 
 _geom_torsion_atom_site_label_1 
 _geom_torsion_atom_site_label_2 
 _geom_torsion_atom_site_label_3 
 _geom_torsion_atom_site_label_4 
 _geom_torsion 
 _geom_torsion_site_symmetry_1 
 _geom_torsion_site_symmetry_2 
 _geom_torsion_site_symmetry_3 
 _geom_torsion_site_symmetry_4 
 _geom_torsion_publ_flag 
C5 Si1 O1 C7 -28.1(2) . . . . ? 
C6 Si1 O1 C7 93.1(2) . . . . ? 
C4 Si1 O1 C7 -149.81(15) . . . . ? 
Si1 O1 C7 C8 118.67(16) . . . . ? 
Si1 O1 C7 C11 -114.19(15) . . . . ? 
C15 N1 C11 C13 -62.1(3) . . . . ? 
C15 N1 C11 C12 59.1(2) . . . . ? 
C15 N1 C11 C7 176.47(18) . . . . ? 
O2 C12 C11 N1 169.39(16) . . . . ? 
O2 C12 C11 C13 -67.4(2) . . . . ? 
O2 C12 C11 C7 53.5(2) . . . . ? 
O1 C7 C11 N1 -43.3(2) . . . . ? 
C8 C7 C11 N1 79.9(2) . . . . ? 
O1 C7 C11 C13 -166.50(16) . . . . ? 
C8 C7 C11 C13 -43.4(2) . . . . ? 
O1 C7 C11 C12 72.93(19) . . . . ? 
C8 C7 C11 C12 -163.93(17) . . . . ? 
C11 N1 C15 O3 7.5(3) . . . . ? 
C11 N1 C15 C16 -172.50(18) . . . . ? 
O1 C7 C8 C9 -70.2(2) . . . . ? 
C11 C7 C8 C9 167.32(17) . . . . ? 
O1 C7 C8 C10 55.3(2) . . . . ? 
C11 C7 C8 C10 -67.2(2) . . . . ? 
O1 Si1 C4 C3 -62.03(18) . . . . ? 
C5 Si1 C4 C3 177.24(19) . . . . ? 
C6 Si1 C4 C3 56.1(2) . . . . ? 
O1 Si1 C4 C1 58.47(18) . . . . ? 
C5 Si1 C4 C1 -62.3(2) . . . . ? 
C6 Si1 C4 C1 176.6(2) . . . . ? 
O1 Si1 C4 C2 178.19(16) . . . . ? 
C5 Si1 C4 C2 57.5(2) . . . . ? 
C6 Si1 C4 C2 -63.7(2) . . . . ? 
N1 C11 C13 C14 -11.2(3) . . . . ? 
C12 C11 C13 C14 -131.1(3) . . . . ? 
C7 C11 C13 C14 108.5(3) . . . . ? 
O3 C15 C16 Cl2A 126.5(3) . . . . ? 
N1 C15 C16 Cl2A -53.5(3) . . . . ? 
O3 C15 C16 Cl1A 23.4(3) . . . . ? 
N1 C15 C16 Cl1A -156.5(3) . . . . ? 
O3 C15 C16 Cl3A -113.0(3) . . . . ? 
N1 C15 C16 Cl3A 67.1(3) . . . . ? 
O3 C15 C16 Cl1B 2.5(3) . . . . ? 
N1 C15 C16 Cl1B -177.4(3) . . . . ? 
O3 C15 C16 Cl3B -99.6(3) . . . . ? 
N1 C15 C16 Cl3B 80.4(3) . . . . ? 
O3 C15 C16 Cl2B 143.2(3) . . . . ? 
N1 C15 C16 Cl2B -36.8(3) . . . . ? 
 
_diffrn_measured_fraction_theta_max    0.991 
_diffrn_reflns_theta_full              30.06 
_diffrn_measured_fraction_theta_full   0.991 
_refine_diff_density_max    0.292 
_refine_diff_density_min   -0.333 
_refine_diff_density_rms    0.049 
